# Supplementary material
Source: publisher figshare collection journal article supplement (https://frontiersin.figshare.com/ndownloader/files/12890342)

# **Counter-balance between Gli3 and miR-7 is required for proper morphogenesis and size control of the mouse brain**

**Longbin Zhang<sup>1,\*</sup>, Taufif Mubarak<sup>2,\*</sup>, Yase Chen<sup>3,\*</sup>, Trevor Lee<sup>2</sup>, Andrew Pollock<sup>2</sup>  
and Tao Sun<sup>1,2,#</sup>**

<sup>1</sup>Center for Precision Medicine, School of Medicine and School of Biomedical Sciences, Huaqiao University, Xiamen, Fujian 361021, China

<sup>2</sup>Department of Cell and Developmental Biology, Cornell University Weill Medical College, 1300 York Avenue, New York, NY 10065

<sup>3</sup>Department of Neurology, Xiangya Hospital, Central South University, Changsha, China

<sup>#</sup>Corresponding author: Dr. Tao Sun, Email: [taosun@hqu.edu.cn](mailto:taosun@hqu.edu.cn)

\*These authors contributed equally to this work.

**Running head:** Counter-balancing roles between Gli3 and miR-7 in cerebral cortex

**Keywords:** Gli3, miR-7, cortical morphogenesis, neural progenitor, cilia

## SUPPLEMENTARY FIGURE LEGENDS

**FIGURE S1.** The inbreeding strategy to produce mouse models. The *Gli3<sup>fl/fl</sup>* mice were mated with *Emx1-Cre;Gli3<sup>fl/+</sup>* mice to obtain *Emx1-Cre;Gli3<sup>fl/fl</sup>* mice (EG), and EG-type mice were mated with *miR-7-Sponge* containing mice to obtain *Emx1-Cre;Gli3<sup>fl/fl</sup>;miR-7-SP* mice. Their offspring was further interbred with *Gli3<sup>fl/fl</sup>* into homozygous mice *Emx1-Cre;Gli3<sup>fl/fl</sup>;miR-7-Sponge* (EGS). *Emx1-Cre;Gli3<sup>+/+</sup>* or *Emx1-Cre;Gli3<sup>fl/+</sup>* mice were used as controls.

**FIGURE S2.** No significant effect of Gli3-deficiency on regulating cerebral cortical thickness. (A,B) The thickness of outboard cortices showed no disorder in *Gli3*-deficient mice and *Gli3/miR-7*-double-deficient mice, but displayed decreases in *miR-7*-silencing mice. Values represent mean  $\pm$  SEM.  $n > 9$ . \*\*\* $P < 0.001$ ; ns, not significant. One-way ANOVA with post-hoc test was used.

**FIGURE S3.** The alteration of basally dividing Pax6<sup>+</sup> progenitors in E15.5 mice brains. The dotted line in the middle of the cortical wall was used to separated the basally dividing Pax6<sup>+</sup> progenitors (upper) from all Pax6<sup>+</sup> marked RGCs. (A) Cortical deficiency of Gli3 increased the proportion of Pax6<sup>+</sup> marked basally dividing progenitors, which was completely rescued by silencing miR-7. Knockdown of miR-7 decreased the proportion. (B) Cortical deficiency of Gli3 and miR-7 had no effect on regulating the number of Pax6<sup>+</sup> marked basally dividing progenitors. Knockdown of

miR-7 decreased the proportion. Values represent mean  $\pm$  SEM.  $n > 9$ .  $^{***}P < 0.01$ ;  $^{***}P < 0.001$ ; ns, not significant. One-way ANOVA with post-hoc test was used. Scale bar = 50  $\mu$ m.

**FIGURE S4.** The regulatory role of Gli3 and miR-7 in controlling neuronal production in the cerebral cortex. **(A,B)** Absence of Gli3 showed no alteration of deep layer marker Tbr1<sup>+</sup>/DAPI<sup>+</sup> cells. But losing function of both miR-7 and Gli3 significantly reduced the proportion of Tbr1<sup>+</sup>/DAPI<sup>+</sup> cells. **Knockdown of miR-7 significantly reduced the proportion of Tbr1<sup>+</sup>/DAPI<sup>+</sup> neurons in the deep layer.** **(A,C)** The upper layer neurons were separated according to the zones of Satb2<sup>+</sup> intensive cell layer and Tbr1<sup>+</sup> marked layer using the white dotted line. Cortical deficiency of Gli3 and miR-7 had no effect on the proportion of upper layer Satb2<sup>+</sup> cells versus DAPI<sup>+</sup> cells. **Knockdown of miR-7 significantly reduced the proportion of Satb2<sup>+</sup>/DAPI<sup>+</sup> neurons in the upper-layer.** The markers Tbr1, Satb2 and DAPI stained for newborn neurons in deeper layer, newborn neurons in upper layer and all cells, respectively. Values represent mean  $\pm$  SEM.  $n > 9$ .  $^{**}P < 0.01$ ; ns, not significant. One-way ANOVA with post-hoc test was used. Scale bar = 100  $\mu$ m.

**FIGURE S5.** The comparison of neural development in the cortical midline region and lateral region. **(A,B)** The fold changes of BrdU<sup>+</sup> cells, Pax6<sup>+</sup> cells and Tbr2<sup>+</sup> cells in E15.5 cortices, and Satb2<sup>+</sup> cells in P0 cortices were higher in the midline than those in the lateral region of EG mice, while Tbr1<sup>+</sup> cells showed no difference between two

regions in E15.5 and P0 EG brains. **(C,D)** The fold changes of each marker were decreased by blocking miR-7 in *Gli3*-knockout cortices. Values represent mean  $\pm$  SEM.  $n > 9$ . \* $P < 0.05$ ; \*\* $P < 0.01$ ; \*\*\* $P < 0.001$ ; ns, not significant. One-way ANOVA with post-hoc test was used.

**FIGURE S6.** Pax6 is a target of miR-7. **(A)** The *Pax6* 3' untranslated region (3'UTR) contained a binding site for miR-7a-2. The seed sequence is shown in red. **(B)** The predicted binding structure between miR-7a-2 and *Pax6* was simulated. The free energy for stabilization of the structure was -13.4 kJ/mol for double strands of Pax6 and miR-7a-2. **(C)** miR-7a-2 suppressed luciferase activities in the construct containing the *Pax6*-3'UTR, while miR-7a-2-SP, but not miR-7a-2-SPmut, rescued the suppression. miR-7a-2-mut had no suppressing activity. **(D)** None notable changes of luciferase activities were detected in the blank construct. Values represent mean  $\pm$  SEM.  $n > 3$ . \* $P < 0.05$ ; \*\*\* $P < 0.001$ ; ns, not significant. One-way ANOVA with post-hoc test was used.

FIGURE S1

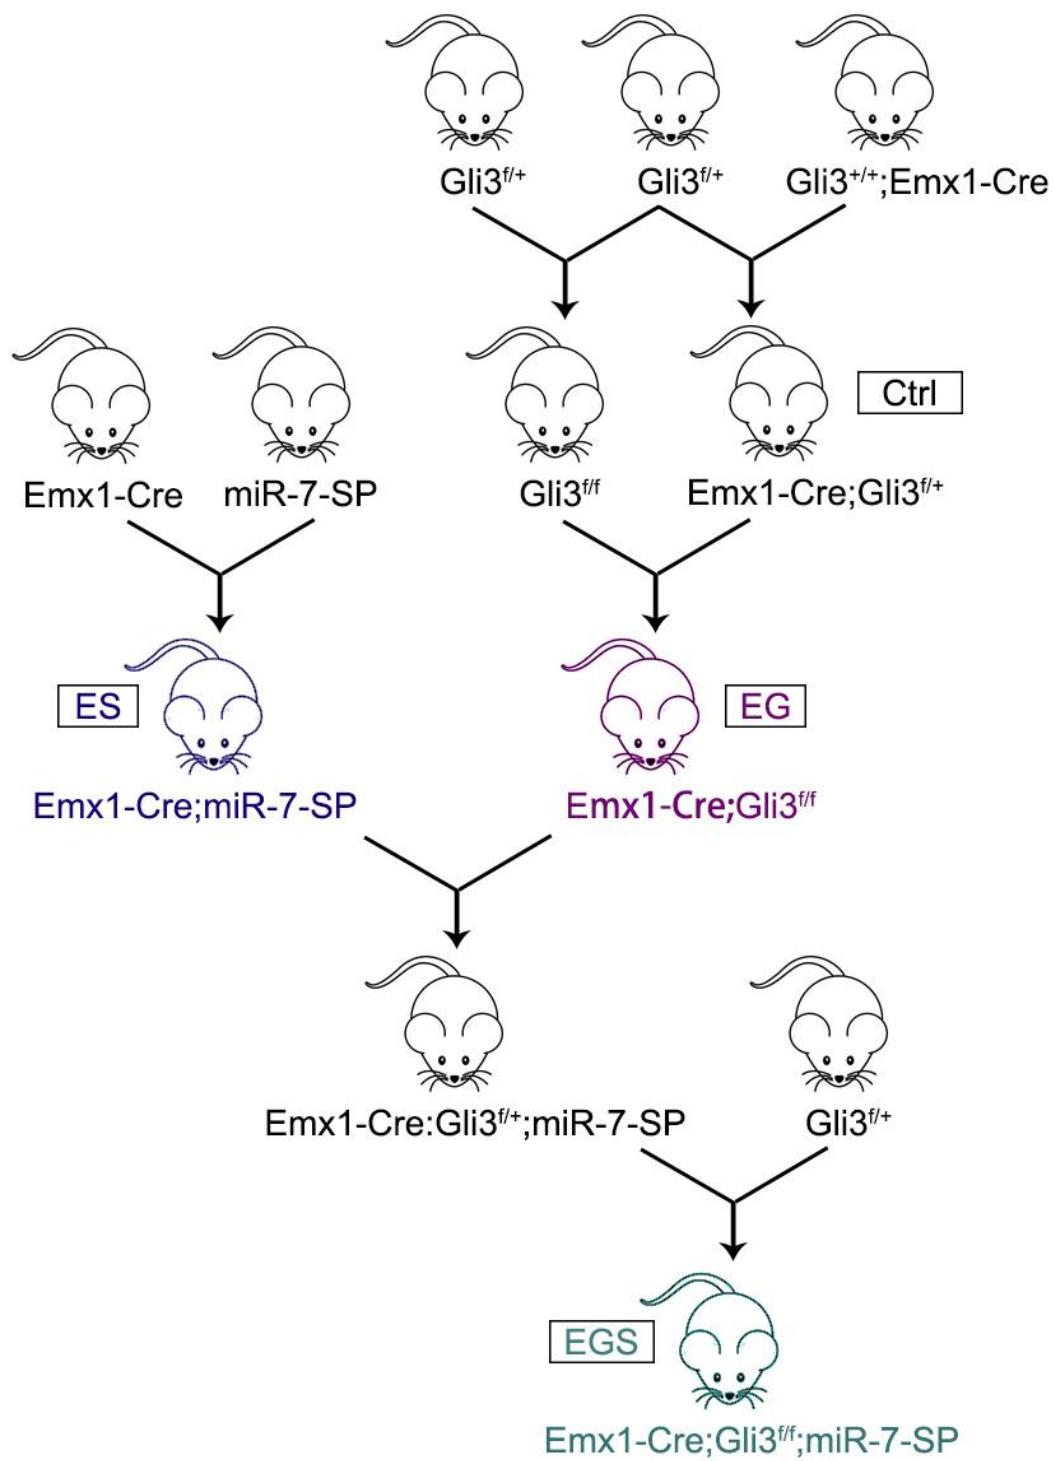

**FIGURE S2**

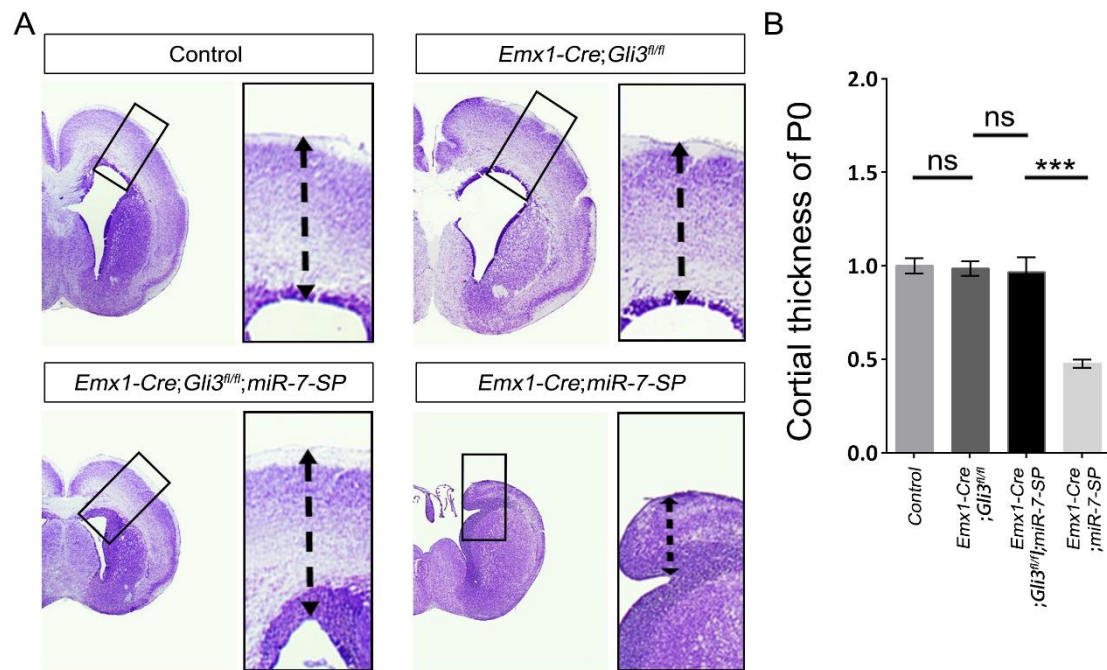

FIGURE S3

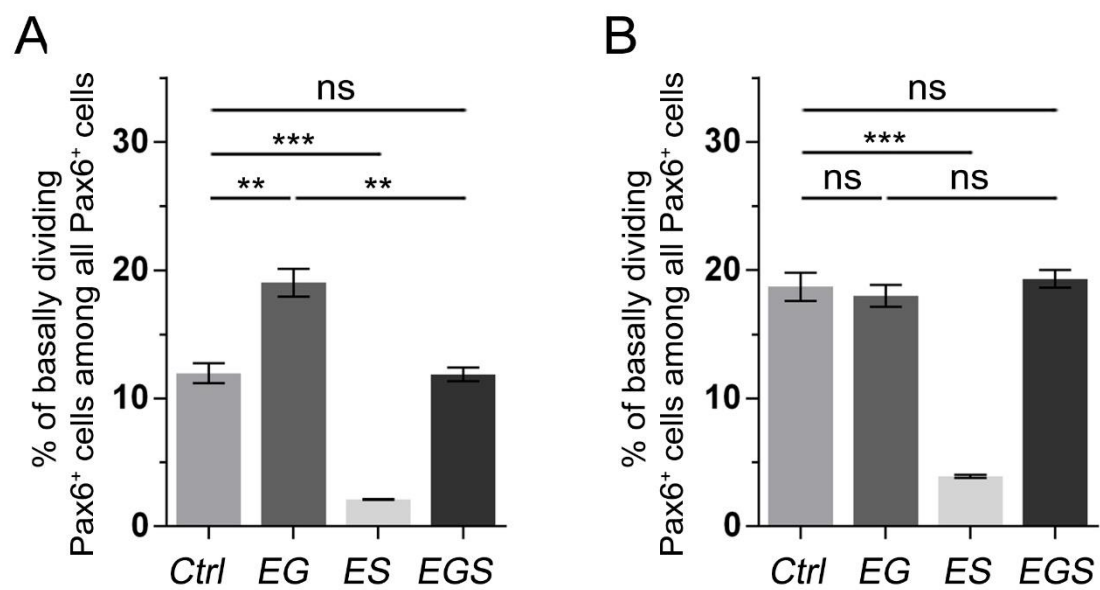

FIGURE S4

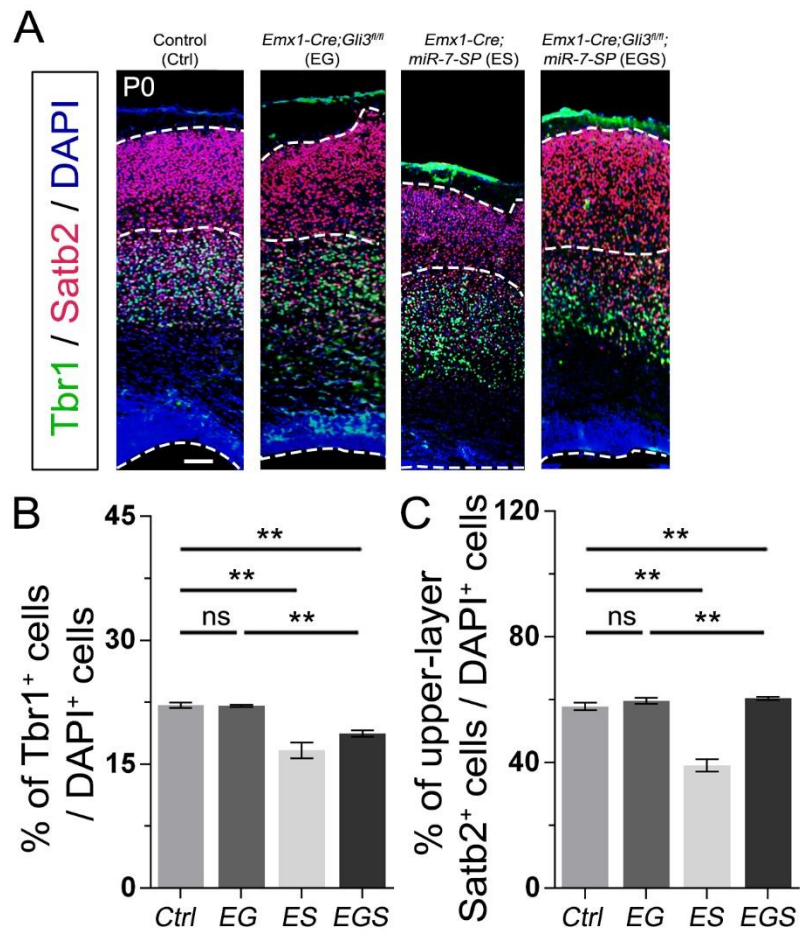



**FIGURE S5**

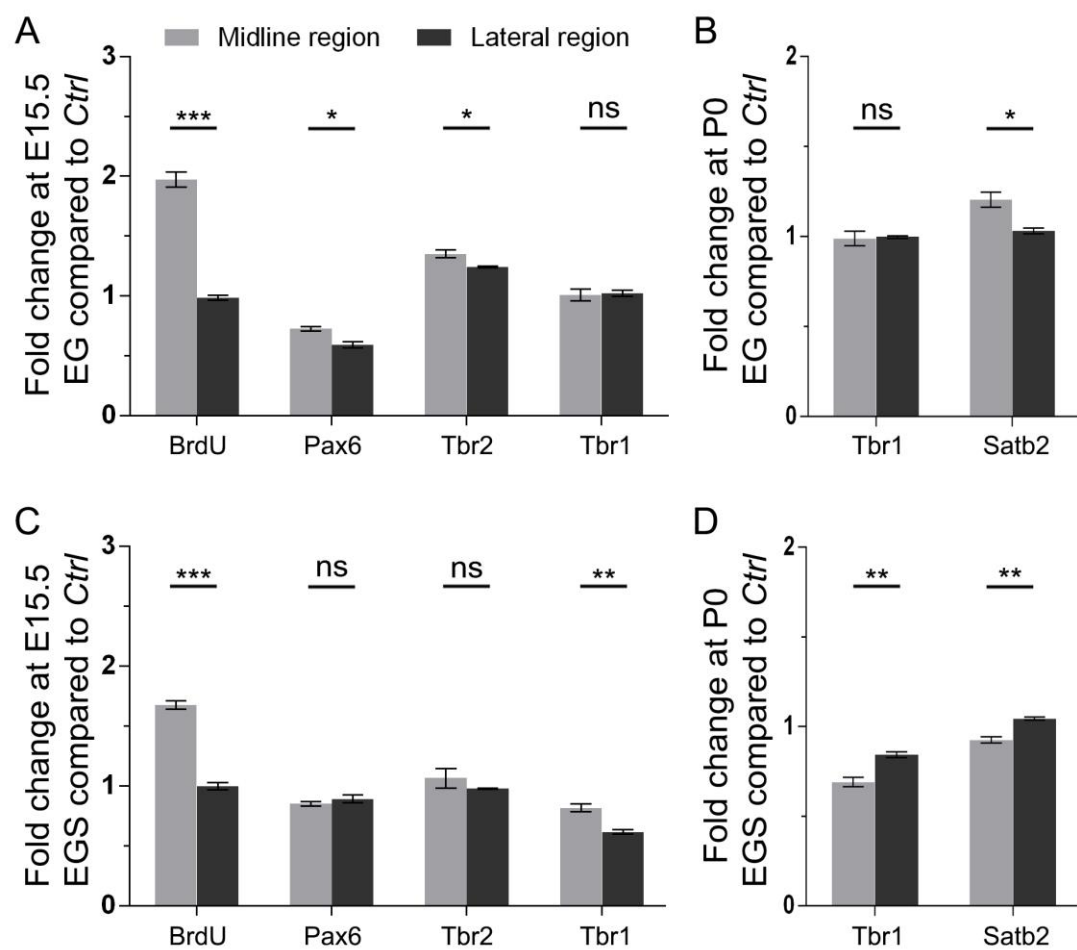

FIGURE S6

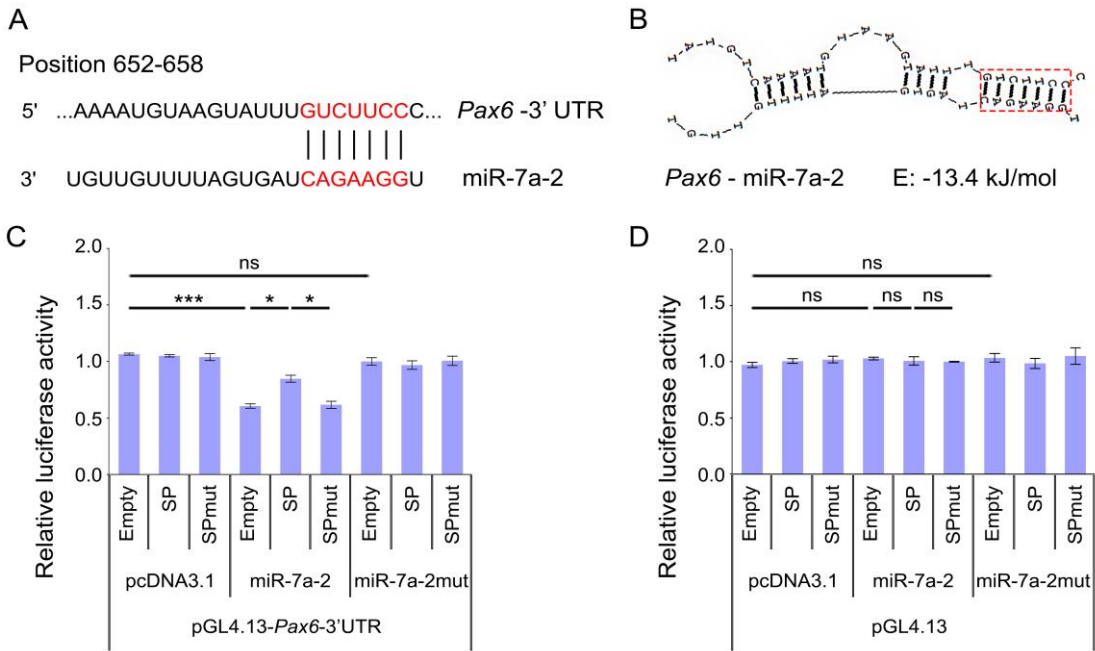

Supplement: Supplementary file [file 12890342]
